# Supplementary material for: Near-infrared excited ultraviolet emitting upconverting phosphors as an internal light source in dry chemistry test strips for glucose sensing
Source: Royal Society of Chemistry journal article supplement (doi:10.1039/c4an02028f), 2015-01-01
Supplement: c4an02028f1.pdf [file c4an02028f1.pdf]

1 Supporting information

2

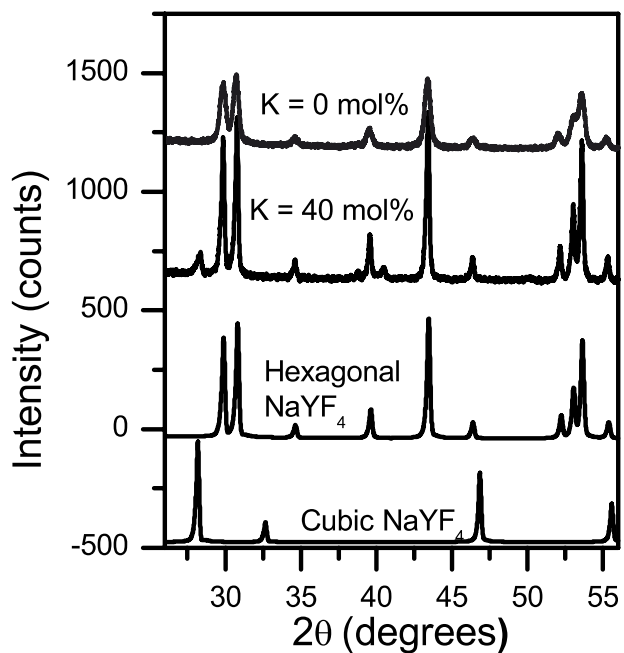

3

4 **Figure S-1.** Typical XRD pattern of the as-prepared NaYF<sub>4</sub>:20 % Yb<sup>3+</sup>, 0.5 % Tm<sup>3+</sup> nanocrystals  
5 synthesized in the presence of 0 and 40 mol% of K<sup>+</sup> concentrations along with reference patterns.

6

7

8

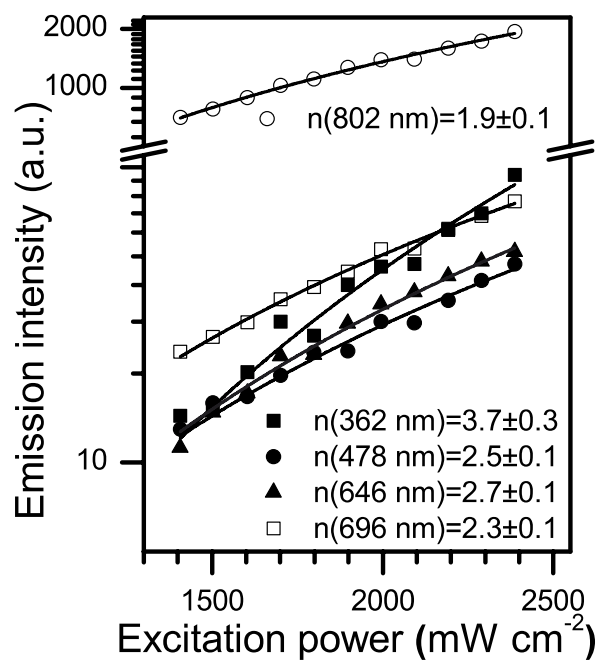

9

10 **Figure S-2.** The excitation power dependence of the emission bands with peak wavelengths at 362,  
 11 478, 646, 696 and 802 nm. The curves are fitted with an equation  $y = ax^n$ , where n determines the  
 12 average number of sequential excitation processes required to produce one emission photon.
